# Supplementary material for: Adaptation of Staphylococcus aureus in a Medium Mimicking a Diabetic Foot Environment
Source: PubMed Central journal article supplement (PMC8005162; doi:10.3390/toxins13030230), 2021-03-22
Supplement: toxins-13-00230-s001.pdf [file toxins-13-00230-s001.pdf]

## Supplementary Materials: Adaptation of *Staphylococcus aureus* in a Medium Mimicking a Diabetic Foot Environment

Cassandra Pouget, Claude-Alexandre Gustave, Christelle Ngba-Esebe, Frédéric Laurent, Emmanuel Lemichez, Anne Tristan, Albert Sotto, Catherine Dunyach-Rémy and Jean-Philippe Lavigne

**Table S1.** Phenotypical modifications of *S. aureus* cultivated in an in vitro wound-like medium (WLM) mimicking the conditions encountered in chronic wounds and with the addition of high glucose concentration and antibiotics during 24 h.

|                                | NSA739         |     | NSA1077        |     | NSA7475        |     | NSA1385        |     |
|--------------------------------|----------------|-----|----------------|-----|----------------|-----|----------------|-----|
|                                | Beta-Hemolysis | SCV | Beta-Hemolysis | SCV | Beta-Hemolysis | SCV | Beta-Hemolysis | SCV |
| WLM alone                      | 100%           | 0%  | 100%           | 0%  | 100%           | 0%  | 100%           | 0%  |
| WLM + glucose 10%              | 100%           | 0%  | 100%           | 0%  | 100%           | 0%  | 100%           | 0%  |
| WLM + vancomycin               | 100%           | 0%  | 100%           | 0%  | 100%           | 0%  | 100%           | 0%  |
| WLM + linezolid                | 100%           | 0%  | 100%           | 0%  | 100%           | 0%  | 100%           | 0%  |
| WLM + glucose 10% + vancomycin | 100%           | 0%  | 100%           | 0%  | 100%           | 0%  | 100%           | 0%  |
| WLM + glucose 10% + linezolid  | 100%           | 0%  | 100%           | 0%  | 100%           | 0%  | 100%           | 0%  |

**Table S2.** Evaluation of feeding behavior by measuring bacterial content of *C. elegans* and pathogen avoidance of *S. aureus* cultivated in an in vitro wound-like medium (WLM) mimicking the conditions encountered in chronic wounds and with the addition of high glucose concentration and antibiotics during 16 weeks.

|                                | NSA739               |                | NSA1077            |                | NSA7475            |                | NSA1385            |                |
|--------------------------------|----------------------|----------------|--------------------|----------------|--------------------|----------------|--------------------|----------------|
|                                | Intestine Survival * | Occupancy Test | Intestine Survival | Occupancy Test | Intestine Survival | Occupancy Test | Intestine Survival | Occupancy Test |
| Without preculture             | 5.1 10E5             | 96 ±3%         | 6.4 10E5           | 94 ±5%         | 4.8 10E5           | 97 ±3%         | 5.3 10E5           | 98 ±2%         |
| WLM alone                      | 4.7 10E5             | 94 ±5%         | 5.2 10E5           | 92 ±4%         | 4.6 10E5           | 94 ±5%         | 5.4 10E5           | 99 ±2%         |
| WLM + glucose 10%              | 3.6 10E5             | 92 ±6%         | 5.6 10E5           | 89 ±6%         | 4.9 10E5           | 96 ±5%         | 5.0 10E5           | 95 ±4%         |
| WLM + vancomycin               | 5.5 10E5             | 96 ±2%         | 5.0 10E5           | 93 ±3%         | 4.2 10E5           | 96 ±4%         | 5.4 10E5           | 93 ±5%         |
| WLM + linezolid                | 6.2 10E5             | 98 ±2%         | 4.4 10E5           | 90 ±5%         | 4.6 10E5           | 92 ±6%         | 4.9 10E5           | 97 ±2%         |
| WLM + glucose 10% + vancomycin | 4.8 10E5             | 92 ±4%         | 5.7 10E5           | 91 ±4%         | 5.0 10E5           | 97 ±2%         | 5.2 10E5           | 97 ±3%         |
| WLM + glucose 10% + linezolid  | 3.3 10E5             | 95 ±3%         | 5.1 10E5           | 92 ±6%         | 4.5 10E5           | 98 ±2%         | 5.5 10E5           | 94 ±4%         |

**Table S3.** Effects of a preculture in a WLM and glucose 10% associated or not to sub-MICs of vancomycin (0.5× MIC) and linezolid (0.5× MIC) on *S. aureus* biofilm formation after 24 h of culture. The kinetics of the early phase of biofilm formation were determined on a) NSA739; b) NSA1077; c) NSA7475; d) NSA1385 by the BioFilm ring test® (BioFilm Control, France). The results represent the mean of BFIs for at least three independent replicates.

| <b>NSA739 24 h</b>       | <b>0 h</b> | <b>2 h</b> | <b>3 h</b> | <b>4 h</b> | <b>5 h</b> | <b>NSA1077 24 h</b>      | <b>0 h</b> | <b>2 h</b> | <b>3 h</b> | <b>4 h</b> | <b>5 h</b> |
|--------------------------|------------|------------|------------|------------|------------|--------------------------|------------|------------|------------|------------|------------|
| Control BHI medium       | 15.0       | 14.7       | 7.5        | 2.7        | 1.8        | Control BHI medium       | 14.4       | 13.2       | 8.4        | 3.9        | 1.9        |
| Glucose 10%              | 14.9       | 14.5       | 7.9        | 3.1        | 1.9        | Glucose 10%              | 14.3       | 13.8       | 8.6        | 4.0        | 2.0        |
| Vancomycin               | 14.7       | 14.6       | 7.2        | 2.7        | 1.9        | Vancomycin               | 14.4       | 13.2       | 8.2        | 3.6        | 1.9        |
| Linezolid                | 15.1       | 14.8       | 7.7        | 3.0        | 2.0        | Linezolid                | 14.2       | 13.5       | 8.5        | 3.7        | 1.8        |
| Glucose 10% + Vancomycin | 15.2       | 14.9       | 7.8        | 2.9        | 1.9        | Glucose 10% + Vancomycin | 14.3       | 13.4       | 8.3        | 3.5        | 1.7        |
| Glucose 10% + Linezolid  | 14.8       | 14.6       | 7.1        | 2.7        | 1.8        | Glucose 10% + Linezolid  | 14.1       | 13.1       | 8.1        | 3.6        | 1.8        |
| <b>NSA7475 24 h</b>      | <b>0 h</b> | <b>2 h</b> | <b>3 h</b> | <b>4 h</b> | <b>5 h</b> | <b>NSA1385 24 h</b>      | <b>0 h</b> | <b>2 h</b> | <b>3 h</b> | <b>4 h</b> | <b>5 h</b> |
| Control BHI medium       | 15.6       | 15.1       | 8.6        | 3.5        | 2.3        | Control BHI medium       | 15.1       | 7.3        | 2.2        | 1.7        | 1.5        |
| Glucose 10%              | 15.2       | 14.9       | 8.3        | 3.1        | 2.2        | Glucose 10%              | 15.3       | 7.5        | 2.3        | 1.8        | 1.4        |
| Vancomycin               | 15.3       | 15.0       | 8.5        | 3.4        | 2.1        | Vancomycin               | 15.4       | 7.4        | 2.2        | 1.6        | 1.6        |
| Linezolid                | 14.9       | 14.7       | 8.4        | 3.4        | 2.2        | Linezolid                | 14.8       | 7.2        | 2.1        | 1.7        | 1.5        |
| Glucose 10% + Vancomycin | 15.4       | 14.9       | 8.6        | 3.3        | 2.2        | Glucose 10% + Vancomycin | 15.1       | 7.4        | 2.4        | 1.9        | 1.5        |
| Glucose 10% + Linezolid  | 14.9       | 14.6       | 8.5        | 3.1        | 2.1        | Glucose 10% + Linezolid  | 15.3       | 7.7        | 2.4        | 1.7        | 1.6        |

**Table S4.** Relative mRNA expression levels of virulence genes of four *S. aureus* strains cultivated in a WLM added with glucose 10%, vancomycin (0.5× MIC), linezolid (0.5× MIC), glucose 10% + vancomycin (0.5× MIC) and glucose 10% + linezolid (0.5× MIC) after 24 h (H24) and 16 weeks (W16).

|                            |                 | NSA739 H24 | NSA739 W16 | 1077 H24 | 1077 W16 | 7475 H24 | 7475 W16 | 1385 H24 | 1385 W16 |
|----------------------------|-----------------|------------|------------|----------|----------|----------|----------|----------|----------|
| WLM alone                  | <i>hla</i>      | 1.1        | -1.88      | 1.22     | -1.92    | 1.14     | -1.78    | 1.04     | -1.25    |
|                            | <i>sea</i>      | 1.21       | -1.82      | 1.25     | -1.76    | 1.09     | -1.44    | 1.16     | -1.33    |
|                            | <i>fnbA</i>     | -0.26      | 1.79       | 1.04     | 1.84     | 1.16     | 1.56     | -0.12    | 1.21     |
|                            | <i>spa</i>      | -0.34      | 1.84       | -0.22    | 1.59     | 1.21     | 1.66     | -0.25    | 1.52     |
|                            | <i>agr</i>      | 1.17       | -1.8       | 1.08     | -1.83    | 1.1      | -1.59    | 1.07     | -1.39    |
|                            | <i>edinB</i>    | ND         | ND         | 1.45     | -1.66    | 1.02     | 1.39     | ND       | ND       |
|                            | <i>lukFS-PV</i> | ND         | ND         | 1.55     | -1.72    | ND       | ND       | ND       | ND       |
| WLM + Glucose 10%          | <i>hla</i>      | 1.22       | -3.07      | 1.29     | -5.14    | 1.08     | -7.59    | 1.58     | -1.05    |
|                            | <i>sea</i>      | 1.27       | -2.89      | 1.25     | -1.84    | 1.03     | -2.61    | 1.14     | -1.67    |
|                            | <i>fnbA</i>     | -1.96      | 4.04       | -1.8     | 3.38     | -1.95    | 3.08     | -1.13    | 1.52     |
|                            | <i>spa</i>      | -2.46      | 2.39       | -7.66    | 3.44     | -2.96    | 2.47     | -1.7     | 1.77     |
|                            | <i>agr</i>      | 1.89       | -2.82      | 1.91     | -2.58    | 1.87     | -2.72    | 1.67     | -1.42    |
|                            | <i>edinB</i>    | ND         | ND         | 10.37    | -6.1     | 8.15     | -7.41    | ND       | ND       |
|                            | <i>lukFS-PV</i> | ND         | ND         | 8.12     | -4.02    | ND       | ND       | ND       | ND       |
| WLM + Vancomycin           | <i>hla</i>      | 1.6        | 3.72       | 1.61     | 2.25     | 1.07     | 2.45     | 1.19     | 1.22     |
|                            | <i>sea</i>      | 1.93       | 5.14       | 1.37     | 2.04     | 1.23     | 3.17     | 1.14     | 1.3      |
|                            | <i>fnbA</i>     | -1.19      | -9.68      | -1.31    | -3.31    | -1.4     | -4.29    | -1.01    | -1.07    |
|                            | <i>spa</i>      | -1.85      | -4.32      | -1.1     | -2.01    | -1.06    | -3.71    | -1.07    | -1.66    |
|                            | <i>agr</i>      | 1.97       | 10.65      | 1.95     | 2.07     | 1.16     | 2.41     | 1.19     | 1.08     |
|                            | <i>edinB</i>    | ND         | ND         | -1.28    | -15.38   | -1.4     | -9.66    | ND       | ND       |
|                            | <i>lukFS-PV</i> | ND         | ND         | 1.88     | -1.2     | ND       | ND       | ND       | ND       |
| WLM + Linezolid            | <i>hla</i>      | -2.37      | -4.57      | -2.15    | -3.03    | -2.03    | -3.31    | -1.14    | -1.05    |
|                            | <i>sea</i>      | -2.58      | -4.37      | -2.05    | -3.38    | -2.06    | -2.49    | -1.42    | -1.21    |
|                            | <i>fnbA</i>     | 2.34       | 3.78       | 1.93     | 3.39     | 1.74     | 2.1      | 1.49     | 1.36     |
|                            | <i>spa</i>      | -1.58      | 4.25       | -3.34    | 2.44     | -3.65    | 8.99     | 1.06     | 1.98     |
|                            | <i>agr</i>      | -1.28      | -2.31      | -1.56    | -2.04    | -1.28    | -2.85    | -1.36    | -1.17    |
|                            | <i>edinB</i>    | ND         | ND         | -2.26    | -22.66   | -3.22    | -14.38   | ND       | ND       |
|                            | <i>lukFS-PV</i> | ND         | ND         | 12.51    | -12.18   | ND       | ND       | ND       | ND       |
| WLM + Glucose + Vancomycin | <i>hla</i>      | -1.48      | -11.67     | -2.1     | -8.96    | -1.5     | -12.52   | -1.12    | -2.01    |
|                            | <i>sea</i>      | -1.42      | -2.21      | -1.38    | -6.03    | -1.89    | -6.56    | -1.1     | -1.67    |
|                            | <i>fnbA</i>     | 3.47       | 5.34       | 2.9      | 4.08     | 2.56     | 2.93     | 1        | 3.78     |
|                            | <i>spa</i>      | 2.84       | 4.61       | 2.19     | 5.71     | 3.33     | 8.31     | 1.31     | 1.99     |
|                            | <i>agr</i>      | -1.97      | -4.49      | -1.46    | -6.37    | -1.23    | -2.88    | -1.27    | -1.76    |
|                            | <i>edinB</i>    | ND         | ND         | 3.6      | -11.6    | 2.42     | -13.14   | ND       | ND       |
|                            | <i>lukFS-PV</i> | ND         | ND         | 4.96     | -22.96   | ND       | ND       | ND       | ND       |
| WLM + Glucose + Linezolid  | <i>hla</i>      | -2.13      | -8.24      | -2.04    | -5.09    | -1.5     | -7.26    | -1.1     | -2.08    |
|                            | <i>sea</i>      | -2.08      | -7.09      | -2.11    | -2.29    | -1.12    | -3.17    | -1.64    | -1.68    |
|                            | <i>fnbA</i>     | 2.61       | 4.6        | 1.24     | 2.23     | 1.13     | 6.82     | 1.37     | 2.84     |
|                            | <i>spa</i>      | -1.85      | 5.05       | -1.99    | 6.25     | -2.5     | 4.84     | -1.19    | 1.62     |
|                            | <i>agr</i>      | -1.27      | -4.78      | -2.43    | -2.12    | -1.5     | -2.43    | -1.06    | -1.9     |
|                            | <i>edinB</i>    | ND         | ND         | -1.34    | -12.2    | 1.2      | -13.07   | ND       | ND       |
|                            | <i>lukFS-PV</i> | ND         | ND         | 3.98     | -22.32   | ND       | ND       | ND       | ND       |

Table S5. Primers used in the study.

| Primer Use and Target Function  | Target Region | Primer Name | Oligonucleotide Sequence              | Tm (°C) | References |
|---------------------------------|---------------|-------------|---------------------------------------|---------|------------|
| <b>a hemolysin</b>              | <i>hla</i>    | hla- F      | 5'- TCCAGTGCAATTGGTAGTCA -3'          | 55.3    | [18]       |
|                                 |               | hla- R      | 5'- GGCTCTATGAAAGCAGCAGA -3'          | 57.3    |            |
| <b>Enterotoxin a</b>            | <i>sea</i>    | sea- F      | 5'- ATGGTGCTTATTATGGTTATC -3'         | 52.0    | [69]       |
|                                 |               | sea- R      | 5'- CGTTTCCAAAGGTACTGTATT -3'         | 54.0    |            |
| <b>PVL<sup>a</sup></b>          | <i>pvl</i>    | lukS-F      | 5'- AATAACGTATGGCAGAAATATGGATGT-3'    | 58.9    | [70]       |
|                                 |               | lukS-R      | 5'- CAAATGCGTTGTGTATTCTAGATCCT-3'     | 60.1    |            |
| <b>Edin</b>                     | <i>edinB</i>  | edinB-F     | 5'- GGTGACGTGAACAAATTATCCGA-3'        | 58.9    | [71]       |
|                                 |               | edinB-R     | 5'- ATCTTTCTTTTGTATCAGAAAGTTTA-3'     | 54.3    |            |
| <b>MSCCRAMM</b>                 | <i>fmbpA</i>  | fmbpA- F    | 5'- AAATGGGAGCAGCATCAGT -3'           | 55.3    | [72]       |
|                                 |               | fmbpA- R    | 5'- GCAGCTGAATTCCCATTTTC -3'          | 55.3    |            |
| <b>Protein A</b>                | <i>spa</i>    | spa-F       | 5'- TATGCCTAACTTAAATGCTG -3'          | 51.1    | [73]       |
|                                 |               | spa- R      | 5'- TTGGAGCTTGAGAGTCATTA -3'          | 53.2    |            |
| <b>Accessory gene regulator</b> | <i>agrA</i>   | agrA-F      | 5'- CAAAGAGAAAACATGGTTACCATTATTAA -3' | 58.2    | [74]       |
|                                 |               | agrA-R      | 5'- CTCAAGCACCTCATAAGGATTATCAG -3'    | 61.6    |            |
| <b>Housekeeping genes</b>       | <i>gyrB</i>   | gyrB-F      | 5'- GGTGGCGACTTTGATCTAGC -3'          | 59.3    | [73]       |
|                                 |               | gyrB-R      | 5'- TTATACAACGGTGGCTGTGC -3'          | 57.3    |            |
